# Supplementary material
Source: bioRxiv or medRxiv preprint supplement (https://www.biorxiv.org/highwire/filestream/76328/field_highwire_adjunct_files/1/249227-2.pdf)
Supplement: Supplementary file [file 249227-2.pdf]

|               | Wild type         | Wild type  | Knock-out         | Knock-out  |
|---------------|-------------------|------------|-------------------|------------|
|               | peptides (unique) | % coverage | peptides (unique) | % coverage |
| TFR1          | 359 (43)          | 56         | 335 (43)          | 56         |
| Tetraspanin-7 | 48 (2)            | 8.8        | 31 (2)            | 8.8        |
| CD1c          | 8 (4)             | 8.4        | 7 (4)             | 11         |
| TMEM16F       | 13 (6)            | 10         | 0                 | 0          |
